# Supplementary material
Source: PubMed Central journal article supplement (PMC7282560)
Supplement: gutjnl-2019-318930supp001.pdf [file gutjnl-2019-318930supp001.pdf]

## Supplemental Figure 1: Selected Cluster Defining Genes in BALB/c, TxA23, and HDT libraries

**A****Total Cells Analyzed**

|                      | Healthy | HDT   | TxA23 | Total |
|----------------------|---------|-------|-------|-------|
| Raw Cell Counts      | 10871   | 10963 | 14793 | 36627 |
| Filtered Cell Counts | 7395    | 9960  | 11996 | 29351 |

**B**

| Gene   | Adj P Value | Cluster |
|--------|-------------|---------|
| Tff1   | 0           | 0       |
| Muc5ac | 0           | 0       |
| Ii33   | 0           | 0       |
| Muc6   | 2.75E-110   | 1       |
| Tff1   | 0           | 2       |
| Muc5ac | 0           | 2       |
| Pga5   | 0           | 3       |
| Muc6   | 0           | 3       |
| Pgc    | 0           | 3       |
| Clu    | 0           | 3       |
| Sox9   | 0           | 3       |
| Atp4b  | 0           | 4       |
| Atp4a  | 0           | 4       |
| Muc6   | 4.49E-272   | 5       |
| Pgc    | 0           | 6       |
| Gif    | 0           | 6       |
| Gif    | 0           | 7       |
| Pgc    | 0           | 7       |

| Gene   | Adj P Value | Cluster |
|--------|-------------|---------|
| Mki67  | 0           | 8       |
| Cdk1   | 0           | 8       |
| Pcna   | 0           | 8       |
| Tff2   | 1.88E-07    | 8       |
| Acta2  | 0           | 9       |
| Myl9   | 0           | 9       |
| Pecam1 | 0           | 10      |
| Ptprc  | 0           | 11      |
| Cd3e   | 0           | 11      |
| Igkc   | 6.90E-77    | 11      |
| Lyz2   | 0           | 12      |
| Csf1r  | 0           | 12      |
| Cd14   | 5.29E-273   | 12      |
| Chga   | 0           | 13      |
| Chgb   | 0           | 13      |
| Hdc    | 0           | 13      |
| Sst    | 7.45E-27    | 13      |
| Trbc2  | 0           | 14      |
| Cd3d   | 0           | 14      |
| Ptprc  | 0           | 14      |
| Ighm   | 0           | 14      |

Supplemental Figure 1: Selected Cluster Defining Genes in BALB/c, TxA23, and HDT libraries. **(A)** Raw and post read filtering counts for number of cells sequenced from BALB/c, TxA23, and HDT libraries. **(B)** Selected cluster defining genes used to label t-SNE clusters in Figure 1.

Supplemental Figure 2: Largest significant differences in gene expression between *Gif+* and *Gif-* metaplasia.

**A** Numbers of Cells Meeting SPEM Criteria

| Library     | Total |
|-------------|-------|
| <i>Gif-</i> | 479   |
| <i>Gif+</i> | 125   |

**B** All genes with Log FC >1, P value <.05

| Gene           | Avg Log FC | pct.1 | pct.2 | Adj P Value | Cluster     |
|----------------|------------|-------|-------|-------------|-------------|
| <i>Gif</i>     | 4.38       | 1     | 0     | 1.85E-117   | <i>Gif+</i> |
| <i>Spp1</i>    | 2.16       | 0.228 | 0.031 | 3.85E-09    | <i>Gif+</i> |
| <i>Gkn3</i>    | 1.69       | 0.833 | 0.585 | 4.73E-11    | <i>Gif+</i> |
| <i>Clps</i>    | 1.58       | 1     | 0.882 | 3.38E-17    | <i>Gif+</i> |
| <i>Pla2g1b</i> | 1.32       | 0.895 | 0.752 | 1.39E-07    | <i>Gif+</i> |
| <i>Cd177</i>   | 1.21       | 0.175 | 0.018 | 1.21E-07    | <i>Gif+</i> |
| <i>Spr2a3</i>  | 1.07       | 0.9   | 0.684 | 5.13E-09    | <i>Gif-</i> |

Supplemental Figure 2. **(A)** Count of cells in the *Tff2+Muc6+Gif-* and *Tff2+Muc6+Gif+* libraries. **(B)** A list of all genes significantly associated with either *Gif+* or *Gif-* metaplasia with log fold change >1 and a p value <0.05.

Supplemental Figure 3: Largest significant differences in gene expression between acute and chronic metaplasia.

### A Number of cells meeting SPEM criteria

| Library              | Total Number |
|----------------------|--------------|
| Drug-Induced         | 184          |
| Inflammation-Induced | 604          |

### B All genes with Log FC >1, P value <.05

| Gene     | Avg Log FC | pct.1 | pct.2 | Adj P Val | Cluster      |
|----------|------------|-------|-------|-----------|--------------|
| Cd74     | 3.91       | 0.922 | 0.012 | 9.70E-71  | Inflammation |
| H2-Ab1   | 2.61       | 0.83  | 0.006 | 3.08E-58  | Inflammation |
| Cym      | 2.49       | 0.25  | 0.065 | 0.00176   | Inflammation |
| H2-Aa    | 2.35       | 0.786 | 0     | 5.88E-53  | Inflammation |
| Spink4   | 2.30       | 0.745 | 0.393 | 5.03E-23  | Inflammation |
| H2-Eb1   | 2.28       | 0.773 | 0     | 1.77E-51  | Inflammation |
| Sprr2a3  | 2.24       | 0.851 | 0.476 | 1.38E-38  | Inflammation |
| H2-K1    | 2.22       | 0.947 | 0.798 | 1.26E-61  | Inflammation |
| Bpifb1   | 2.15       | 0.834 | 0.405 | 6.20E-33  | Inflammation |
| Spp1     | 2.15       | 0.643 | 0.076 | 2.08E-54  | Drug         |
| H2-D1    | 2.07       | 0.979 | 0.929 | 1.55E-68  | Inflammation |
| AW112010 | 2.02       | 0.673 | 0.143 | 5.49E-32  | Inflammation |
| B2m      | 1.83       | 0.97  | 0.982 | 1.01E-57  | Inflammation |
| Pga5     | 1.71       | 0.685 | 0.268 | 4.51E-21  | Inflammation |
| Muc6     | 1.67       | 1     | 1     | 1.67E-17  | Inflammation |
| Ly6a     | 1.41       | 0.356 | 0.036 | 7.44E-12  | Inflammation |
| Cela1    | 1.41       | 0.827 | 0.379 | 4.10E-32  | Drug         |
| Gkn3     | 1.40       | 0.81  | 0.635 | 1.02E-12  | Drug         |
| Psmb8    | 1.39       | 0.685 | 0.161 | 4.91E-33  | Inflammation |
| Nupr1    | 1.37       | 0.223 | 0.083 | 0.32407   | Inflammation |
| Rbp1     | 1.37       | 0.595 | 0.131 | 4.90E-36  | Drug         |
| Ttr      | 1.34       | 0.75  | 0.181 | 5.85E-46  | Drug         |
| Tmsb10   | 1.30       | 0.972 | 0.923 | 1.23E-43  | Inflammation |
| Ubd      | 1.24       | 0.312 | 0     | 8.12E-12  | Inflammation |
| Chil4    | 1.24       | 0.142 | 0     | 0.008003  | Inflammation |
| H2-DMa   | 1.19       | 0.577 | 0.018 | 3.33E-30  | Inflammation |
| Kcne3    | 1.19       | 0.613 | 0.108 | 2.78E-40  | Drug         |
| Psmb9    | 1.15       | 0.625 | 0.173 | 2.03E-25  | Inflammation |
| Iigp1    | 1.14       | 0.324 | 0.018 | 3.18E-11  | Inflammation |
| Pigr     | 1.14       | 0.952 | 0.762 | 2.53E-30  | Inflammation |
| Scgb2b7  | 1.08       | 0.274 | 0.131 | 0.598698  | Inflammation |
| Gm10260  | 1.08       | 0.976 | 0.591 | 1.60E-43  | Drug         |
| H2-DMb1  | 1.05       | 0.533 | 0     | 1.81E-27  | Inflammation |
| H2-Q7    | 1.04       | 0.575 | 0.036 | 1.21E-28  | Inflammation |
| Cgref1   | 1.02       | 0.519 | 0.345 | 4.07E-05  | Inflammation |

Supplemental Figure 3. (A) Count of cells in the drug-induced and inflammation-induced SPEM libraries. (B) A list of all genes significantly associated with either drug-induced or inflammation-induced metaplasia with log fold change >1 and a p value <0.05.
